# Supplementary material for: Drug-loadable Mesoporous Bioactive Glass Nanospheres: Biodistribution, Clearance, BRL Cellular Location and Systemic Risk Assessment via 45Ca Labelling and Histological Analysis
Source: PubMed Central journal article supplement (PMC5024120; doi:10.1038/srep33443), 2016-09-15
Supplement: srep33443-s1.pdf [file srep33443-s1.pdf]

**Drug-loadable Mesoporous Bioactive Glass Nanospheres:  
Biodistribution, Clearance, BRL Cellular Location and Systemic  
Risk Assessment via  $^{45}\text{Ca}$  Labelling and Histological Analysis**

**Baiyan Sui<sup>1</sup>, Gaoren Zhong<sup>2</sup> and Jiao Sun<sup>1,\*</sup>**

<sup>1</sup> Shanghai Biomaterials Research & Testing Center, Shanghai Key Laboratory of Stomatology, Ninth People's Hospital, Shanghai Jiaotong University School of Medicine, Shanghai 200023, China

<sup>2</sup> School of Pharmacy, Fudan University, Shanghai 201203, China

\*Corresponding Author: E-mail: jiaosun59@126.com

Address: No. 427, Ju-men Road, Shanghai 200023, China.

Tel.:+86 21 63034903; Fax: +86 21 63011643.

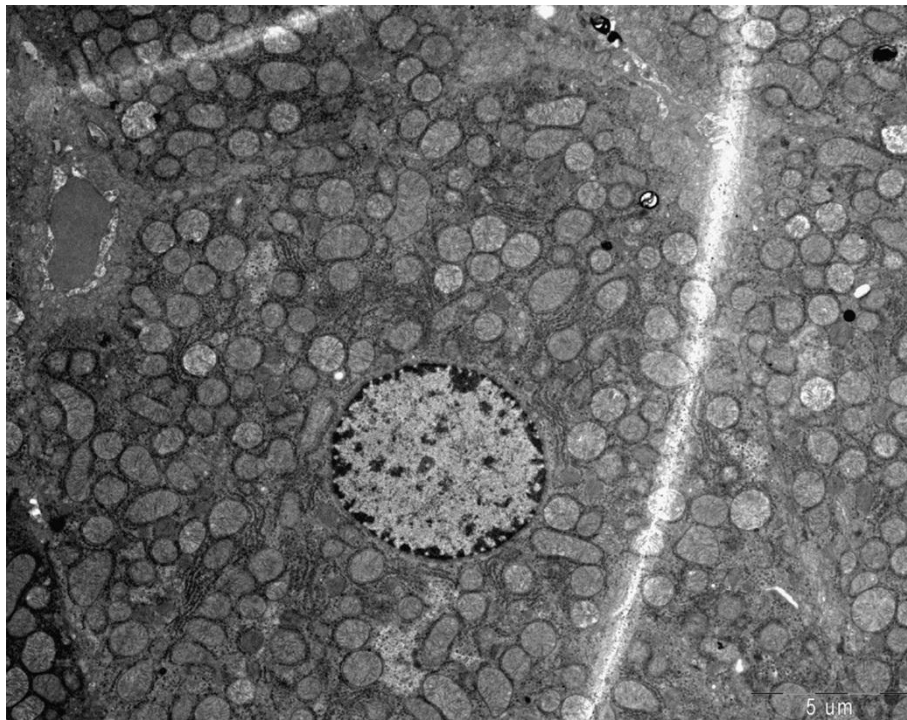

Figure.1 TEM images analysis of liver after injection with MBG nanospheres at 30 d.

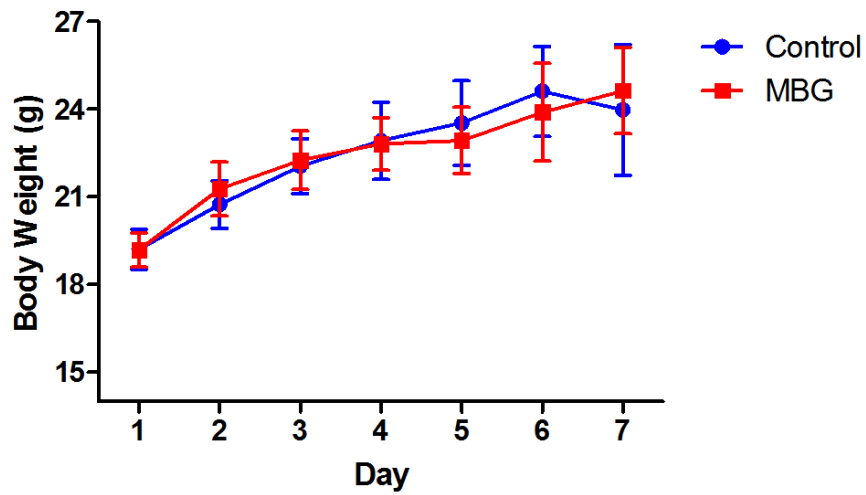

Figure.2 Average body weights of mice injected (i.v.) with MBG nanospheres once per day for 7 days. The results are presented as mean values  $\pm$  SD.

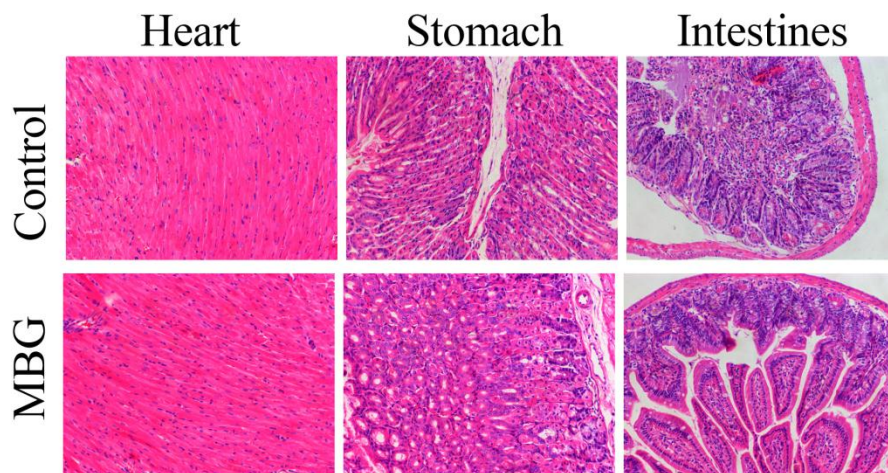

Figure.3 Sections from mice tissues after continuous injection with MBG nanospheres. All sections were stained with H&E and observed under a light microscope at  $200\times$  magnification.
